# Supplementary material
Source: PubMed Central journal article supplement (PMC6805113)
Supplement: JB.00420-19-s0001.pdf [file JB.00420-19-s0001.pdf]

1 **SUPPLEMENTAL INFORMATION**

2

3

4 Robust suppression of lipopolysaccharide deficiency in *Acinetobacter baumannii* by  
5 growth in minimal medium

6

7 Emma Nagy<sup>1</sup>, Richard Losick<sup>1</sup>, Daniel Kahne<sup>1,2,3#</sup>

8

9 <sup>1</sup>Department of Molecular and Cellular Biology, Harvard University, Cambridge, MA, USA

10 <sup>2</sup>Department of Chemistry and Chemical Biology, Harvard University, Cambridge, MA,  
11 USA

12 <sup>3</sup>Department of Biological Chemistry and Molecular Pharmacology, Harvard Medical  
13 School, Boston, MA, USA

14

15 #Address correspondence to Daniel Kahne: kahne@chemistry.harvard.edu

16

17

18

19

20

21

22

23

24 **SUPPLEMENTAL INFORMATION**

25

26

27 **Figure S1. Passaging results in restoration of wild type growth profiles.** Growth of  
28 passaged replicates at the indicated number of days after initiation in LB at 25°C.

29 Panels 1 and 2 are replicates of  $\Delta lpxC$  and panel 3 is a replicate of  $\Delta mlaA\Delta lpxC$ . Wild  
30 type is shown for comparison. The replicates shown are representative of the types of  
31 growth improvement seen over the course of the experiment.

32

33

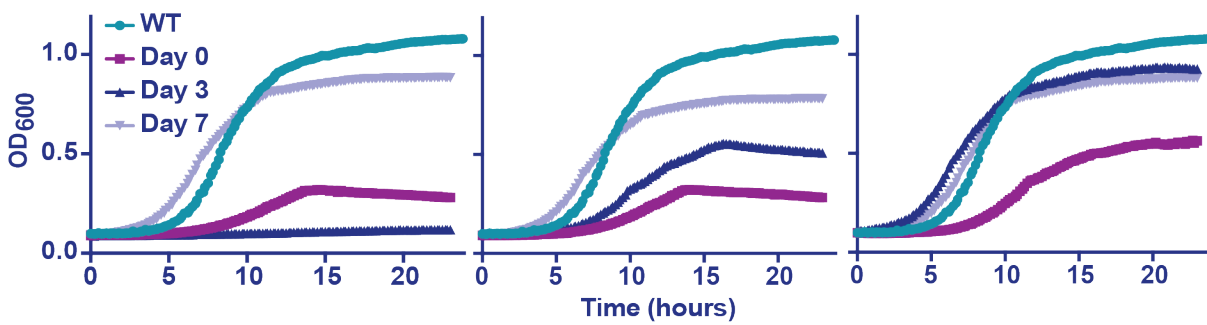

34

35

36

37

38

39

40

41

42

43

44

45

46 **Figure S2. Mutations in both *mia* and *pldA* are required for growth improvement**

47 **in an LPS deficient strain.** Strains are grown in LB at 37°C.

48

49

50

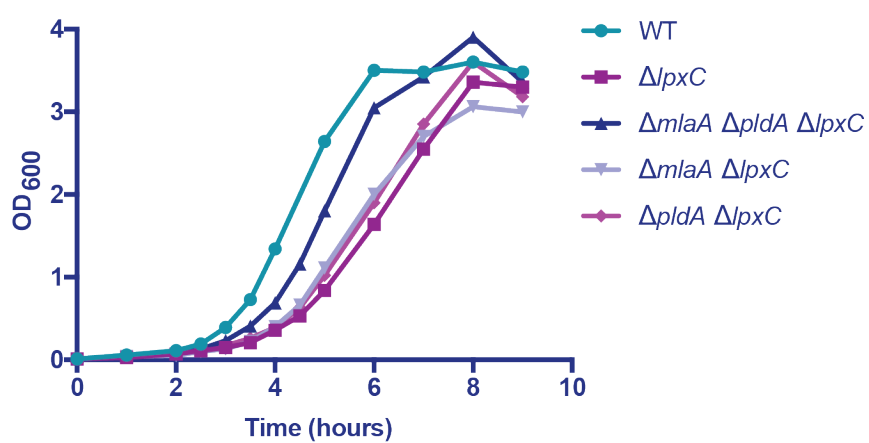

51

52

53

54

55

56

57

58

59

60

61

62

63

64 **Table S1. Strains and plasmids used in this study.**

65

| Strain or Plasmid                                | Genotype                                               | Reference or Source     |
|--------------------------------------------------|--------------------------------------------------------|-------------------------|
| <i>A. baumannii</i> ATCC 19606                   | Wild type                                              | ATCC                    |
| <i>A. baumannii</i> <i>lpxC</i> mutant           | $\Delta lpxC::kan$                                     | Moison et al., 2016 (1) |
| <i>A. baumannii</i> <i>miaA lpxC</i> mutant      | $\Delta lpxC::apr$<br>$\Delta miaA::kan$               | This study              |
| <i>A. baumannii</i> <i>pldA lpxC</i> mutant      | $\Delta lpxC::apr$<br>$\Delta pldA::kan$               | This study              |
| <i>A. baumannii</i> <i>miaA pldA lpxC</i> mutant | $\Delta pldA$ $\Delta lpxC::apr$<br>$\Delta miaA::kan$ | This study              |
| pEX18ApGW                                        | Vector for gene replacement                            | Hoang et. Al, 1998 (2)  |
| pEX18ApGW- <i>pldA</i>                           | Deletion vector for <i>pldA</i>                        | This study              |

66

67

68

69

70

71

72

73

74

75

76

77

78 **Table S2. Mutations found in suppressor screen.** The first set of replicates were79  $\Delta lpxC$  at the start of the screen and the second set listed below were  $\Delta mlaA \Delta lpxC$ .

80 Only assigned mutations are listed, with a few exceptions. The references for the genes listed

81 are as follows: *pldA* (DJ41\_RS17655), Peptidase M16 (DJ41\_RS17650), *m1aA*82 (DJ41\_RS06905), *m1aD* (DJ41\_RS11945), *m1aF* (DJ41\_RS11935), *adeJ* (DJ41\_RS13520), and83 *adeR* (DJ41\_RS18535).

84

| Replicate | Gene/Reference | Mutation                                     | Position | Result              |
|-----------|----------------|----------------------------------------------|----------|---------------------|
| 1         | <i>pldA</i>    | Insertion with target site duplication (5bp) | 1091     | Disruption          |
|           | <i>m1aA</i>    | Deletion ( $\Delta$ 708bp)                   | *        | Disruption          |
| 2         | <i>pldA</i>    | (A) <sub>7</sub> → <sub>6</sub>              | 238      | Truncation          |
|           | <i>m1aA</i>    | Deletion ( $\Delta$ 693bp)                   | *        | Disruption          |
| 3         | DJ41_RS17650   | Insertion with target site duplication (4bp) | 2937     | Disruption          |
|           | DJ41_RS10490   | Insertion with target site duplication (5bp) | 453      | Disruption          |
| 4         | DJ41_RS17650   | Insertion with target site duplication (5bp) | 386      | Disruption          |
|           | <i>m1aA</i>    | Insertion with target site duplication (4bp) | 448      | Disruption          |
| 5         | <i>pldA</i>    | G→A                                          | 1022     | W341*               |
|           | <i>m1aA</i>    | Deletion ( $\Delta$ 709bp)                   | *        | Disruption          |
| 6         | DJ41_RS17650   | Insertion with target site duplication (4bp) | 278      | Disruption          |
|           | <i>m1aA</i>    | T→G                                          | 457      | N152K               |
| 7         | <i>pldA</i>    | Deletion ( $\Delta$ 3bp)                     | 1023     | $\Delta$ W341 A342C |
|           | <i>m1aA</i>    | Deletion ( $\Delta$ 730bp)                   | *        | Disruption          |
|           | DJ41_RS17650   | Deletion ( $\Delta$ 92bp)                    | 5        | Disruption          |

|                  |                       |                                                              |                 |                     |
|------------------|-----------------------|--------------------------------------------------------------|-----------------|---------------------|
| 8                | <i>mIaD</i>           | Insertion with target site duplication (5bp)                 | 296             | Disruption          |
| 9                | DJ41_RS17650          | Insertion with target site duplication (5bp)                 | 1757            | Disruption          |
|                  | <i>mIaA</i>           | Deletion ( $\Delta$ 1770bp)                                  | *               | Disruption          |
| 10               | DJ41_RS17650          | Insertion with target site duplication (4bp)                 | 2932            | Disruption          |
|                  | <i>mIaA</i>           | Insertion with target site duplication (4bp)                 | 451             | Disruption          |
| 11               | DJ41_RS17650          | Deletion ( $\Delta$ 2193bp)                                  | 548             | Disruption          |
|                  | <i>mIaA</i>           | Deletion ( $\Delta$ 2820)                                    | *               | Disruption          |
| 12               | DJ41_RS17650          | Insertion with target site duplication (5bp)                 | 1730            | Disruption          |
|                  | <i>mIaA</i>           | Insertion with target site duplication (5bp)                 | 454             | Disruption          |
| 13               | <i>pIaA</i>           | (A) <sub>7→6</sub>                                           | 238             | Truncation          |
|                  | DJ41_RS10490          | Insertion with target site duplication (4bp)                 | 452             | Disruption          |
| 14               | DJ41_RS17650          | Insertion with target site duplication (4bp)<br>(Unassigned) | 2937            | Disruption          |
|                  | <i>mIaF</i>           | New junction with repeat region (Unassigned)                 | 87              | Disruption          |
| 15               | <i>pIaA</i>           | Deletion ( $\Delta$ 19bp)                                    | 1078            | Truncation          |
|                  | <i>mIaA</i>           | Deletion ( $\Delta$ 1529bp)                                  | *               | Disruption          |
| <b>Replicate</b> | <b>Gene/Reference</b> | <b>Mutation</b>                                              | <b>Position</b> | <b>Result</b>       |
| 1                | <i>pIaA</i>           | Deletion ( $\Delta$ 1bp)                                     | 895             | Truncation          |
| 2                | <i>pIaA</i>           | Insertion with target site duplication (4bp)                 | 340             | Disruption          |
| 3                | DJ41_RS17650          | T→A                                                          | 140             | L47*                |
| 4                | <i>pIaA</i>           | (A) <sub>7→6</sub>                                           | 238             | Truncation          |
| 5                | <i>pIaA</i>           | Deletion ( $\Delta$ 3bp)                                     | 1023            | $\Delta$ W341 A342C |
| 6                | <i>pIaA</i>           | Insertion with target site duplication (5bp)                 | 536             | Disruption          |
| 7                | DJ41_RS17650          | Insertion with target site duplication (4bp)                 | 2815            | DJ41_RS17650        |
|                  | <i>adeI</i>           | Insertion with target site duplication (4bp)                 | 2385            | Disruption          |

|    |              |                                                           |         |            |
|----|--------------|-----------------------------------------------------------|---------|------------|
| 8  | DJ41_RS17650 | Insertion with target site duplication (4bp)              | 294     | Disruption |
|    | DJ41_RS13530 | Insertion with target site duplication (5bp)              | 600     | Disruption |
| 9  | DJ41_RS17650 | Insertion with target site duplication (4bp)              | 2926    | Disruption |
| 10 | <i>pldA</i>  | New junction with repeat region (Unassigned)              | 400/887 | Disruption |
|    | <i>adeR</i>  | Insertion with target site duplication (5bp) (Unassigned) | 423     | Disruption |
| 11 | <i>pldA</i>  | Insertion with target site duplication (5bp)              | 524     | Disruption |
|    | <i>adeR</i>  | Insertion with target site duplication (4bp) (Unassigned) | 186     | Disruption |
| 12 | DJ41_RS17650 | Insertion with target site duplication (4bp)              | 646     | Disruption |
|    | <i>adeJ</i>  | Deletion ( $\Delta$ 13bp)                                 | 1961    | Truncation |

85

86

87

88

89

90

91

92

93

94

95

96

97

98

99

100 **Table S3. Primers used in this study.** Underlined regions represent areas of overlap.

| Primer                     | Sequence (5' - 3')                                        | Application                                                                                            |
|----------------------------|-----------------------------------------------------------|--------------------------------------------------------------------------------------------------------|
| <b>Strain Construction</b> |                                                           |                                                                                                        |
| <i>mIaA</i> _up_F          | GGTGCCAATTCTGGCTCATCAATTAC                                |                                                                                                        |
| <i>mIaA</i> _up_R          | <u>CGAATTCGCGGCCGCTTCTA</u><br>TCCGAAGTAGCGGCAGATTCTT     | Amplification of upstream and downstream regions of <i>mIaA</i> for <i>mIaA</i> -kanR linear construct |
| <i>mIaA</i> _down_F        | <u>GAGCTCGCTTGGACTCCTGT</u><br>GCGTTCCAGATTGCCGAGAA       |                                                                                                        |
| <i>mIaA</i> _down_R        | GTACCAGTCGCCTGATAAATAGGCA                                 |                                                                                                        |
| <i>mIaA</i> _seq_F         | GTAGGTCTTTACACCTCAGCCC                                    | Verification of <i>mIaA</i> gene knock out                                                             |
| <i>mIaA</i> _seq_R         | CTTCTGGTACATCTTCAGATTCGTCATC                              |                                                                                                        |
| <i>IpxC</i> _up_F          | CATTACTGGTGGCGATGACATCAC                                  | Amplification of upstream and downstream regions of <i>IpxC</i> for <i>IpxC</i> -aprR linear construct |
| <i>IpxC</i> _up_R          | <u>GCGTAATCTGCTGCTTGCAA</u><br>CTCCATCCACGGTATGTGGAATG    |                                                                                                        |
| <i>IpxC</i> _down_F        | <u>GCGGAGAACGAGATGACGTT</u><br>CAGCTATTACGCAATGTTCAAAGCGA |                                                                                                        |
| <i>IpxC</i> _down_R        | AGGAAACCTTACGTTTCTAACAACGC                                |                                                                                                        |
| <i>IpxC</i> _seq_F         | CACACTCACGTATGGAATTGGACAG                                 | Verification of <i>IpxC</i> gene knock out                                                             |
| <i>IpxC</i> _seq_R         | AGCGAGTGAATAGGTCTTCATAGC                                  |                                                                                                        |
| <i>pldA</i> _up_F          | GGTATTGGCAGCTTACTTGCGTAATG                                | Amplification of upstream and downstream regions of <i>pldA</i> for <i>pldA</i> -kanR linear construct |
| <i>pldA</i> _up_R          | <u>CGAATTCGCGGCCGCTTCTA</u><br>GGCTAAGGTGTCGGCATATGC      |                                                                                                        |
| <i>pldA</i> _down_F        | <u>GAGCTCGCTTGGACTCCTGT</u><br>CTGCGCGGACACTTCCAATTAT     |                                                                                                        |
| <i>pldA</i> _down_R        | GATGCTACTCATGTTTCATCGGTGG                                 |                                                                                                        |
| <i>pldA</i> _seq_F         | TTTACAGCTAAGTATGGGAACCCTG                                 |                                                                                                        |
| <i>pldA</i> _seq_R         | CCGGCATAAGTTGCACGATG                                      |                                                                                                        |



|                         |                                                                                  |                                                                                                                                     |
|-------------------------|----------------------------------------------------------------------------------|-------------------------------------------------------------------------------------------------------------------------------------|
| Kan_F                   | TAGAAGCGGCCGCGAATTCG                                                             | Amplification of KanR cassette                                                                                                      |
| Kan_R                   | ACAGGAGTCCAAGCGAGCTC                                                             |                                                                                                                                     |
| Apr_F                   | TTGCAAGCAGCAGATTACGC                                                             | Amplification of AprR cassette                                                                                                      |
| Apr_R                   | AACGTCATCTCGTTCTCCGC                                                             |                                                                                                                                     |
| <i>pldA</i> _up_pEX_F   | <u>TTCCCAGTCACGACGTTGTAAAACGACG</u><br><u>GCCAGTGCCA</u><br>GCAGCAACGTAAGACACGCT | Amplification of upstream region of <i>pldA</i> with 5' overlap to pEX18ApGW and 3' overlap to the downstream region of <i>pldA</i> |
| <i>pldA</i> _up_pEX_R   | <u>CATAACCATTAAATAATTGGAAGTGTCGG</u><br><u>CGCAG</u><br>GGCTAAGGTGTCGGCATATGC    |                                                                                                                                     |
| <i>pldA</i> _down_pEX_F | <u>ATGTGCGTCGGTGGCATATGCCGACACC</u><br><u>TTAGCC</u><br>CTGCGCGGACACTTCCAATTAT   | Amplification of downstream region of <i>pldA</i> with 5' overlap to the upstream region of <i>pldA</i> and 3' overlap to pEX18ApGW |
| <i>pldA</i> _down_pEX_R | <u>AGGAAACAGCTATGACCATGATTACGAAT</u><br><u>TCGAGCTCG</u><br>TATGGCTTTGCTCGGGGACT |                                                                                                                                     |
| pEX_ <i>pldA</i> _F     | CGAGCTCGAATTCGTAATCATGGTCA                                                       | Amplification of pEX18ApGW                                                                                                          |
| pEX_ <i>pldA</i> _R     | TGGCACTGGCCGTCGTTTTA                                                             |                                                                                                                                     |
| <i>pldA</i> _pEX_seq_F  | GGGTGCTTCGTTACGCAGTAAG                                                           | To verify pEX18ApGW integration at <i>pldA</i> site                                                                                 |
| <i>pldA</i> _pEX_seq_R  | GGCCTTAAACAGCAAATGATGGCT                                                         |                                                                                                                                     |

101

102

103

104

105

106

107

108

109 **REFERENCES**

110

- 111 1. Moison E, Xie R, Zhang G, Lebar MD, Meredith TC, Kahne D. 2017. A Fluorescent Probe  
112 Distinguishes between Inhibition of Early and Late Steps of Lipopolysaccharide  
113 Biogenesis in Whole Cells. ACS Chem Biol 12:928-932.
- 114 2. Hoang TT, Karkhoff-Schweizer RR, Kutchma AJ, Schweizer HP. 1998. A broad-host-range  
115 Flp-FRT recombination system for site-specific excision of chromosomally-located DNA  
116 sequences: application for isolation of unmarked *Pseudomonas aeruginosa* mutants.  
117 Gene 212:77-86.  
118
